# Supplementary material
Source: publisher site journal article supplement (https://www.dovepress.com/article/409864)
Supplement: Supplementary file 1 [file get_supplementary_file.php]

**Supporting Information**

**Table S1** Sequences of oligonucleotides used in the experiment

| **Name** | **Sequences (5'-3')** |
| --- | --- |
| Primer | AATCCGTCGAGCAGAGTT |
| S1 | ACCCGACGTATCACTGACTATCTGCCTAACCCTAACCCT |
| S2 | AGTCAGTGATACGTCGGGTTAGGC |
| S3 | GGTTAGGCAGATCATCGAC |
| S4 | AGGGTTAGGCAGATAGTCAGTGATACGTCGGGT |
| H1 | HS-ATACGTCGGGTTAGGCAGATCATCGACGCCTAACCCGACGTATCACTGACT |
| H2 | HS-AGATCATCGACATACGTCGGGTTAGGCGTCGATGATCTGCCTAACC-NH2 |

**Table S2** Comparison of SERS and ELISA method in real samples

| **Method** | **1 h** | **12 h** | **24 h** |
| --- | --- | --- | --- |
| SERS (×10-3 IU/mL) | 2.316 | 34.357 | 124.535 |
| ELISA (×10-3 IU/mL) | 2.473 | 31.273 | 118.056 |
| Relative error (%) | -4.912 | 4.445 | 6.223 |
